# Supplementary material
Source: publisher site journal article supplement (https://www.dovepress.com/article/427752)
Supplement: Supplementary file 1 [file get_supplementary_file.php]

**Orurengo rw’okweyinamirira kw`abakazi baamara kuzaara**

Eiziina: _________________________________ Norugankahi: _________________________

Ebiiro byokuzarwa: ______________________

Ebiiro ebyomwaana yazarirweho__________________

Enamba y`esimu: _________________________________

Nkonkw’orugire kutunga omwana, nitwenda kumanya nkonkw’orikwehurira.Noshabwa ngu otorane ekyokugarukamu ekirihihi nokobire ori **OMU BIRO MUSHANJU (7) EBIHWIRE**, kutari nkokworikwehurira obwahati.

Omubiiro mushanju ebihwire:

1. Mbiire nimbaasa kusheka kandi ndeeba norubaju oruri kushemeza aha bintu:

Nkoku kirikubasika

Obwahati ti munonga munonga

Buzima ti munonga hati

Apaana

1. Ebintu eby’omumeisho nimbiranzya nanokushemererwa:

Nk'okuntuura ninkora

Kikakyendeera mu kakye

Kikakyendeera munonga

Kukye munoonga

3. Nyekyweerire omushango n'obukibire kitakwetaagisa hagira ekyashoba

Eego, emirundi erikukira obwingyi

Eego, rumwe na rumwe

Ngaaha, timunoonga

Ngaaha, tinkakikoraga

4. Nyerarikirire hatariho nshonga yamaani

Ngaaha, tinkakikoraga

Kigumire

Eego, obumwe

Eego, emirundi miingyi

*5. Mpurire okutiina ninga okubuguutana kandi hatariho nshonga yamaani

Eego emirundi miingyi

Eego obumwe n'obumwe

Ngaaha timunonga

Ngaaha ekyo tinkakikoraga

*6. Ebintu bitwiire nibinkiza amaani

Eego obwiire obwingyi ndemirwe kubigumira

Eego obumwe ndemirwe kubigumira nk'obutoosha

Ngaaha, obwiire obwingyi mbasize kubigumira

Ngaaha, ntwiire nimbirabamu gye nk'obutoosha

*7. Ntwiire ntashemereirwe ndikuburwa n’oturo

Eego emirundi miingyi

Eego bumwe na bumwe

Ngaaha timunonga

Ngaaha ekyo tikikambahoga

*8. Hariho obumpurire kubi ninga nkashoberwa

Eego emirundi miingyi

Eego nikikira kumbaho

Ti munonga

Tikikambahoga

*9. Ntwiire ntashemereirwe n'okurira ndi kurira

Eego emirundi miingyi

Eego nikikira kumbaho

Rumwe na rumwe

Ngaaha tikikambahoga

*10. Ekiteekateeko ky'okwekora kubi kiranyiziire

Eego emirundi miingyi

Obumwe

Kigumire

Tikikambahoga

Administered/ Reviewed by: _______________________________Date:_________________

Adapted from Cox, J.L., Holden, J.M., and Sagovsky, R. 1987. Detection of postnatal depression: Development of the 10-item Edinburgh Postnatal Depression Scale. British Journal of Psychiatry 150:782-786. 1. 2018 © Cambridge University Press, translated with permission.
